# Supplementary material
Source: ML conference proceedings conference paper supplement (https://proceedings.neurips.cc/paper_files/paper/2016/hash/3937230de3c8041e4da6ac3246a888e8-Abstract.html)
Supplement: Supplementary file [file 3937230de3c8041e4da6ac3246a888e8-Supplemental.zip]

---

# Completely random measures for modelling block-structured sparse networks — supplementary material

---

**Tue Herlau   Mikkel N. Schmidt   Morten Mørup**  
 DTU Compute  
 Technical University of Denmark  
 Richard Petersens plads 31,  
 2800 Lyngby, Denmark  
 {tuhe,mmor,mnsc}@dtu.dk

## Derivation of posterior Distribution

The posterior distribution will be derived using a counting argument inspired by Pitman (2003, eqn. (32)). Consider first the case where the interaction strengths  $(\eta_{\ell m})_{\ell m}$  and block sizes  $(\beta_\ell)_\ell$  has a fixed value and that number of edges  $L_{\ell m}$  within each tile  $(\ell, m)$  is given and recall the NRM is defined as:

$$P = \frac{\mu}{T} = \sum_{i=1}^{\infty} p_i \delta_{\theta_i}, \quad p_i = \frac{w_i}{T}, \quad T = \mu(\mathbb{S}) = \sum_{i=1}^{\infty} w_i. \quad (1)$$

Since not all potential vertices (i.e. terms  $w_i \delta_{\theta_i}$  in  $\mu$ ) will have edges attached to them it is useful to introduce a variable which encapsulates this distinction. We therefore define the variable  $\tilde{z}_i = 0, 1, \dots, K$  with the definition:

$$\tilde{z}_i = \begin{cases} z_i & \text{if there exist } (x, y) \in X_\alpha \text{ st. } \theta_i \in \{x, y\}, \\ 0 & \text{otherwise.} \end{cases}$$

Suppose in addition for each measure  $\mu_\ell$ , the end-points of the edges associated with this measure selects  $k_\ell = |\{i : \tilde{z}_i = \ell\}|$  unique atoms and that the number of edge-endpoints selecting any particular atom  $w_i$  is  $n_i$ . This naturally divides the edge-endpoints associated with a particular measure  $\ell$  into a partition,  $\{B_1, \dots, B_{k_\ell}\}$  (Pitman, 2003), and we denote by  $\Pi_{\ell, 2L}$  this random partition for measure  $\ell$ . For a particular measure the joint distribution

$$P(\Pi_{\ell, 2L} = \{B_1, \dots, B_{k_\ell}\}, w_i \in dw_i, T_\ell \in dT_\ell) \quad (2)$$

is obtained from three contributions (with  $\alpha_\ell \equiv \beta_\ell \alpha$ ):

- The mass parameter  $T_{\alpha_\ell}$  is distributed as  $g_{\alpha_\ell, \sigma, \tau}$
- For each  $\ell = 1, \dots, K$ , there must be a Poisson atom in  $dw_i$  for each  $i$  such that  $\tilde{z}_i = \ell$
- For each  $\ell$ , we know there are Poisson atoms in  $(dw_i)_{\tilde{z}_i=\ell}$ , however since the measure of these intervals is infinitesimal, the remaining mass  $T_\ell - \sum_{i:\tilde{z}_i=\ell} w_i$  is still distributed as  $g_{\alpha_\ell, \sigma, \tau}$ .
- Each edge-endpoint selects the atom independently with probability given by the NRM of eqn. (1),  $w_i/T_\ell$ .

The probability eqn. (2) can then be obtained from these three contributions as (with  $k = \sum_{\ell=1}^K k_\ell$  being the total number of vertices in the network):

$$\left\{ \prod_{i=1}^k \alpha_{\sigma, \tau}(dw_i) \right\} \prod_{\ell}^K \left\{ g_{\alpha_\ell, \sigma, \tau}(T_\ell - \sum_{i:\tilde{z}_i=\ell} w_i) \right\} \left\{ \prod_{i:\tilde{z}_i=\ell} \left( \frac{w_i}{T_\ell} \right)^{n_i} \right\} \quad (3)$$

where  $n_i$  is the total number of times a particular atom  $i$  of  $\mu_\ell$  is selected in the process. To connect these definitions to actual network data, i.e. an array  $(A_{ij})_{i,j=1}^k$ , notice if the atom  $(w_i, \theta_i)$  corresponds to a particular vertex  $i$  in the network then  $n_i = \sum_j (A_{ij} + A_{ji})$ .

Returning to eqn. (3) for a particular  $\ell$ , the expression can be integrated by introducing the variables  $s_\ell = \sum_{i:\tilde{z}_i=\ell} w_i$  corresponding to the sum of the *selected* atoms, introducing the parameters  $x_i = w_i/s_{z_i}$ , and integrating (Pitman, 2003; Lijoi et al., 2008; Favaro & Teh, 2013). With  $n_\ell = \sum_{i:\tilde{z}_i=\ell} n_i$  eqn. (3) can be written as a product over  $K$  factors:

$$\prod_{i:\tilde{z}_i=\ell}^k (1-\sigma)^{n_i} \int_0^{T_\ell} ds_\ell \frac{s_\ell^{n_\ell-k_\ell\sigma-1} g_{\alpha,\sigma,\tau}(T_\ell-s_\ell)}{\Gamma(n_\ell-k_\ell\sigma) T_\ell^{n_\ell} \alpha_\ell^{-k_\ell} e^{\tau s_\ell}}. \quad (4)$$

Recall the number of edges within each tile  $L_{\ell m}$  is Poisson with rate  $\eta_{\ell m} T_\ell T_m$ . In addition, when considering a concrete observed data matrix the edges does not have a particular labelling which is otherwise introduced in the proceeding counting argument. Thus, if we observe a number  $A_{ij}$  of edges between vertices  $i, j$  in a particular tile, we must consider all ways a network with this number of edges can be obtained by our generative process. This is equivalent to the number of ways of selecting the particular edge-counts of the total edge-counts within each tile. The multiplicity becomes the multinomial coefficient:

$$\binom{L_{\ell m}}{(A_{ij})_{\tilde{z}_i=\ell, \tilde{z}_j=m}} = \frac{L_{\ell m}!}{\prod_{\tilde{z}_i=\ell, \tilde{z}_j=m} A_{ij}!}. \quad (5)$$

The probability of obtaining a particular observed network  $A_{ij}$  can be obtained by combining eqs. (4), (5) and the Poisson rates for the edge-counts within each tile to obtain:

$$P(A, (z_i)_i | (\eta_{\ell m})_{\ell m}, (\beta_\ell)_\ell) = \left\{ \prod_{\ell=1}^K \int_0^\infty dT_\ell \{ \text{eqn. (4)} \} \right\} \prod_{\ell m} \left\{ \text{Poisson}(L_\ell | \eta_{\ell m} T_\ell T_m) \frac{L_{\ell m}!}{\prod_{\tilde{z}_i=\ell, \tilde{z}_j=m} A_{ij}!} \right\}.$$

Defining  $n_{\ell m} = \sum_{\tilde{z}_i=\ell, \tilde{z}_m=j} A_{ij}$  and simplifying

$$P(A, (z_i)_i | (\eta_{\ell m}), (\beta_\ell)_\ell) = \frac{1}{\prod_{ij} A_{ij}!} \prod_\ell \left[ \int_0^\infty \int_0^{T_\ell} dT_\ell ds_\ell \right] \left[ \prod_{\ell m} \eta_{\ell m}^{n_{\ell m}} e^{-\sum_{\ell m} \eta_{\ell m} T_\ell T_m} \right] \left\{ \prod_\ell E_\ell \right\}$$

where we have defined

$$E_\ell = \frac{\alpha_\ell^{k_\ell} s_\ell^{n_\ell-k_\ell\sigma-1}}{\Gamma(n_\ell-k_\ell\sigma) e^{\tau s_\ell}} g_{\alpha_\ell, \tau, \sigma}(T_\ell-s_\ell) \prod_{\tilde{z}_i=\ell} (1-\sigma)^{n_i}.$$

Similar to Lijoi et al. (2008) we will use the simple change-of-variable from  $T$  to  $t = T - s$  and a change in the order of integration to obtain:

$$\int_{\mathbb{R}^+} \int_0^s dT ds h(T, s) = \iint_{\mathbb{R}_+^2} ds dt h(t+s, s). \quad (6)$$

Then introducing the Gamma-priors for  $\eta_{\ell m}$ , Dirichlet prior for  $(\beta_\ell)_\ell$  and integrating over  $\eta_{\ell m}$  we obtain the final expression:

$$P(A, (z_i)_i, \sigma, \tau, (\alpha_\ell, s_\ell, t_\ell)_\ell) = \frac{\Gamma(\beta_0) \prod_{\ell=1}^K \alpha_\ell^{\frac{\beta_0}{K}-1} E_\ell}{\Gamma(\frac{\beta_0}{K})^K \alpha^{\beta_0} \prod_{ij} A_{ij}!} \prod_{\ell m} \frac{G(\lambda_a + n_{\ell m}, \lambda_b + T_\ell T_m)}{G(\lambda_a, \lambda_b)} \quad (7)$$

where  $G(a, b) = \Gamma(a)b^{-a}$  is the normalization factor of the Gamma distribution and  $T_\ell = t_\ell + s_\ell$ . Finally notice the  $\eta = 1$  case, corresponding to collapsed version of Caron & Fox (2014), can be obtained by taking the limit  $\lambda_a = \lambda_b \rightarrow \infty$  in which case  $\frac{G(\lambda_a+n, \lambda_b+T)}{G(\lambda_a, \lambda_b)} \rightarrow e^{-T}$ . When discussing the  $K = 1$  case we will assume this limit has been taken.

## Inference details

Sampling the expression eqn. (7) requires three types of sampling updates: For  $A_{ij}$  we must apply a sampling procedure to impute missing values, the sequence of block-assignments  $(z_i)_i$  must be updated, the parameters associated with the random measure  $\sigma, \tau$  must be updated and finally the remaining variables  $(\alpha_\ell, s_\ell, t_\ell)$  associated with each expression  $E_\ell$  must be updated. We will first consider the later problem:

**Update of variables associated with each  $E_\ell$ :** All terms except the densities  $g_{\alpha, \sigma, \tau}$  are amenable to standard sampling techniques. In (Caron & Fox, 2014) this expression was sampled by employing a proposal distribution proportional to the density, thus allowing their value to cancel. In our work we opted for the approach of Lomelí et al. (2014) in which  $u$  in Zolotarev’s integral representation (see main text for details) is considered an auxiliary parameter. Thus, introducing  $u_\ell \in ]0, \pi[$  for each  $\sigma$ -stable random variable gives the full set of variables  $\Phi_\ell = (\alpha_\ell, s_\ell, t_\ell, u_\ell)$  for each  $E_\ell$  term. For convenience, the domain of the variables are in turn transformed to  $\mathbb{R}$  using the standard change-of-variables  $x \mapsto e^x$  for  $\alpha, t$  and  $s$  and the logistic mappings  $x \mapsto (1 + e^{-x})^{-1}$ ,  $x \mapsto \pi(1 + e^{-x})^{-1}$  for  $\sigma$  and  $u$ . We found a simple random-walk Metropolis-Hastings sampling with a  $\mathcal{N}(0, \sigma = 0.1)$  kernel (50 steps per iteration) was robust and efficient compared to the other updates.

**Update of  $z_i$ :** These variables can be updated directly from the likelihood eqn. (7), however we opted to re-impute the weights  $(w_i)_{\bar{z}_i=\ell}$  by inverting the integration step from eqn. (3) to eqn. (4) to obtain

$$(w_i/s_\ell)_{i:\bar{z}_i=\ell} \sim \text{Dirichlet}((n_i - \sigma)_{i:\bar{z}_i=\ell}). \quad (8)$$

Doing this for each  $\ell = 1, \dots, K$  allows all variables  $z_i$  to be updated in a regular Gibbs sweep.

**Update of  $A_{ij}$ :** Most networks are binary whereas the model assumes count-data. Furthermore to test the model it is useful to predict the presence of unobserved edges. Both of these difficulties are resolved by imputation. Suppose we are given a matrix  $W$  such that  $W_{ij} = 1$  iff. the edge-count  $A_{ij}$  is unobserved. Furthermore assume  $A_{ij}$  is binary and must be imputed. Edges can then in principle be imputed directly by performing MCMC updates of  $A_{ij}$  and accepting/rejecting according to the likelihood eqn. (7), however the coupling between different counts through the gamma functions in  $E_\ell$  would make such a sampling procedure prohibitively expensive. This difficulty is not present in Caron & Fox (2014) where the sociability-vector  $(w_i)_i$  are retained and updates using Hamiltonian Monte-Carlo, however we can re-sample  $(w_i)_i$  and  $(\eta_{\ell m})_{\ell m}$  from their marginal distributions and use the re-sampled values of  $(w_i)_i$  to impute the corresponding values of  $(A_{ij})$ . Thus for each plate  $(\ell, m)$  we sample  $(w_i)_{\bar{z}_i=\ell}$  from (8) and  $\eta_{\ell m}$  from

$$\eta_{\ell m} \sim \text{Gamma}(n_{\ell m} + \lambda_a, (t_\ell + s_\ell)(t_m + s_m) + \lambda_b) \quad (9)$$

the distribution of each unobserved  $A_{ij}$  is then simply  $\text{Poisson}(\eta_\ell w_i w_j)$ ,  $z_i = \ell$ ,  $z_j = m$ .

## Validation of the sampler

To investigate the validity of the sampling procedure, we considered the  $K = 1, \lambda_a = \lambda_b \rightarrow \infty$  case and used the sampling procedure of (Caron & Fox, 2014) with  $(\alpha = 2, \sigma = 0.5, \tau = 1)$  to generate 250 000 random networks. As described in the previous section the probability of any given network is fully determined by the edge-endpoint counts  $(n_1, \dots, n_k)$  and the probability of a particular sequence of counts is permutation invariant. If ordered decreasingly this gives 41 unique vectors of edge-endpoint counts  $(n_1, \dots, n_k)$  for  $L = 0, 1, 2, 3, 4$  (see vertical axis on figure 1a) and the generated networks were binned according to their edge-endpoint count signature (networks with more than 4 edges were discarded). In this manner we obtained an estimate of the true frequency of a particular network signature. This estimate of the frequency was compared against the probability of a given network as computed by eqn. (17). Notice that due to permutation invariance the probability of each network signature must be corrected by multiplying eqn. (17) with a factor obtained by a combinatorial argument (see for instance Pitman (2006, eqn. (2.2)))

$$\frac{n!}{\sum_{i=1}^k m_i (i!)^{m_i} m_i!}, \quad \text{where} \quad m_i = \sum_{j=1}^k 1(n_j = i).$$

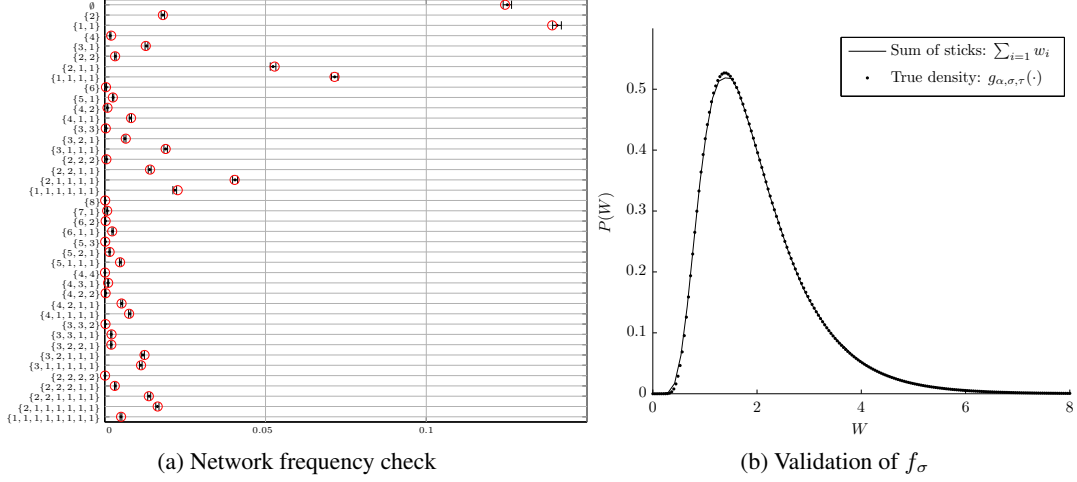

Figure 1: (Left:) The estimated frequency of all unique networks binned according to their unique edge-endpoint counts  $(n_1, \dots, n_k)$ . (ordered decreasingly) for  $L = 0, \dots, 4$  edges (41 in total, red circles), as well as the frequency obtained by computing the probability (see text for details). (Right:) The density of the stick length  $\sum_i w_i$  for the randomly generated networks as well as the true density eqn. (11) obtained by numerical integration of eqn. (10)

We thus obtain two estimates of the probability of a particular network signature shown in figure 1a, both in close agreement.

In figure 1b is shown the estimated density of the total mass  $T$  obtained by numerically integrating Zolotarev's integral representation of  $f_\sigma$

$$f_\sigma(x) = \frac{\sigma x^{\frac{-1}{1-\sigma}}}{\pi(1-\sigma)} \int_0^\pi du A(\sigma, u) e^{-A(\sigma, u)/x^{\sigma/(1-\sigma)}},$$

$$A(\sigma, u) = \left[ \frac{\sin((1-\sigma)u)^{1-\sigma} \sin(\sigma u)^\sigma}{\sin(u)} \right]^{\frac{1}{1-\sigma}}, \quad (10)$$

$$g_{\alpha, \sigma, \tau}(t) = \theta^{-\frac{1}{\sigma}} f_\sigma(t\theta^{-\frac{1}{\sigma}}) \phi_\lambda(t\theta^{-\frac{1}{\sigma}}). \quad (11)$$

The estimated density of the total mass  $T$  obtained by summing the generated sticks ( $w_i$ ). Both the estimates of the networks signatures and the density of  $T$  are in close agreement.

### Datasets and preparation

To test the methods we selected 11 publicly available datasets describing social networks, co-authorship networks and biological networks.

**Yeast:** Interaction network of 2361 proteins in yeast (Bu et al., 2003).

**SmaGri:** Coauthorship network of 1059 authors from the Garfield's collection of citation networks (Batagelj & Mrvar, 2014).

**SciMet:** Coauthorship network of 3084 authors from the Scientometrics journal, 1978-2000 (Batagelj & Mrvar, 2014).

**Netscience:** Coauthorship network of 1589 authors working in network theory as compiled by Newman (2006).

**Hagman:** Structural brain networks where edges correspond to the number of fiber tracts between 998 brain regions. All five networks in the dataset were simply averaged to produce a single network (Hagmann et al., 2008).

**NIPS:** Consisting of the 2865 authors who have coauthored papers together at the 1-12'th NIPS conference (Roweis, 2009).

**Caltech, Simmons, Reed, Haverford, Swarthmore:** Five social networks of 769, 1446, 962, 1518, 1659 students respectively obtained from the Facebook100 dataset (Traud et al., 2011).

The datasets were processed similarly by first removing any vertices without edges, i.e. where  $n_i = 0$ , and thresholding at 0 to produce binary networks. Selection of the missing edges for link prediction was done by first removing a fraction of 5% of all potential edges at random and then, if this procedure left any vertices without attached edges, re-introducing one of the edges attached to each such vertex and removing (at random from all other potential edges) a single edge. This procedure was repeated until 5% of the potential edges were removed and all vertices had at least one edge attached.

## Models considered

In addition to non-parametric extensions of the Poisson SBM we compared the CRMSBM against a degree corrected block model, the *degree-corrected stochastic block model* (DCSBM) of Herlau et al. (2014). This model is not exchangeable but does model block structure and sociability.

Specifically the DCSBM assumes a generative process of the form:

$$\begin{aligned}(z_1, \dots, z_n) &\sim \text{CRP}(\alpha) \\ \eta_{\ell m} &\sim \text{Gamma}(\lambda_a, \lambda_b) \\ (\theta_{i\ell}^{(1)}), (\theta_{i\ell}^{(2)}) &\sim \text{Dirichlet}((\gamma)_{i=1}^{k_\ell}) \\ A_{ij} &\sim \text{Poisson}(k_{z_i} k_{z_j} \theta_{i z_i}^{(1)} \theta_{j z_j}^{(2)} \eta_{z_i z_j}).\end{aligned}$$

To be consistent with the CRMSBM we selected a prior of the form  $\text{Gamma}(2, 1)$  for  $\alpha, \lambda_a$  and  $\lambda_b$ . The model is somewhat sensitive to the choice of prior for  $\gamma$  however we found a prior of the form  $\text{Gamma}(2, 1)$  to perform reasonably well. The DCSBM reduces to a model without degree-correction, the pIRM (Kemp et al., 2006), by the choice  $\gamma_{i\ell} = \frac{1}{n_\ell}$ .

## References

- Batagelj, Vladimir and Mrvar, Andrej. Pajek. In *Encyclopedia of Social Network Analysis and Mining*, pp. 1245–1256. Springer, 2014.
- Bu, Dongbo, Zhao, Yi, Cai, Lun, Xue, Hong, Zhu, Xiaopeng, Lu, Hongchao, Zhang, Jingfen, Sun, Shiwei, Ling, Lunjiang, Zhang, Nan, et al. Topological structure analysis of the protein–protein interaction network in budding yeast. *Nucleic acids research*, 31(9):2443–2450, 2003.
- Caron, Francois and Fox, Emily B. Bayesian nonparametric models of sparse and exchangeable random graphs. *arXiv preprint arXiv:1401.1137*, 2014.
- Favaro, Stefano and Teh, Yee Whye. MCMC for normalized random measure mixture models. *Statistical Science*, 28(3):335–359, 2013.
- Hagmann, Patric, Cammoun, Leila, Gigandet, Xavier, Meuli, Reto, Honey, Christopher J, Wedeen, Van J, and Sporns, Olaf. Mapping the structural core of human cerebral cortex. *PLoS biology*, 6(7):e159, 2008.
- Herlau, Tue, Schmidt, Mikkel N, and Mørup, Morten. Infinite-degree-corrected stochastic block model. *Phys. Rev. E*, 90:032819, Sep 2014. doi: 10.1103/PhysRevE.90.032819.
- Kemp, Charles, Tenenbaum, Joshua B, Griffiths, Thomas L, Yamada, Takeshi, and Ueda, Naonori. Learning systems of concepts with an infinite relational model. In *AAAI*, volume 3, pp. 5, 2006.
- Lijoi, Antonio, Prünster, Igor, and Walker, Stephen G. Bayesian nonparametric estimators derived from conditional gibbs structures. *The Annals of Applied Probability*, 18(4):1519–1547, 2008.
- Lomelí, María, Favaro, Stefano, and Teh, Yee Whye. A marginal sampler for  $\sigma$ -stable Poisson-Kingman mixture models. *arXiv preprint arXiv:1407.4211*, 2014.
- Newman, Mark E J. Finding community structure in networks using the eigenvectors of matrices. *Physical review E*, 74(3):036104, 2006.
- Pitman, Jim. Poisson-Kingman partitions. *Lecture Notes-Monograph Series*, pp. 1–34, 2003.

- Pitman, Jim. *Combinatorial Stochastic Processes: Ecole D'Eté de Probabilités de Saint-Flour XXXII-2002*. Springer, 2006.
- Roweis, Sam. Data for MATLAB hackers. <http://www.cs.nyu.edu/~roweis/data.html>, 2009. [Online; accessed 24-April-2015].
- Traud, Amanda L., Mucha, Peter J., and Porter, Mason A. Facebook data scrape related to paper "The Social Structure of Facebook Networks". <https://archive.org/details/oxford-2005-facebook-matrix>, 2011. [Online; accessed 24-April-2015].
